# Supplementary material
Source: PubMed Central journal article supplement (PMC10299816)

**A****i**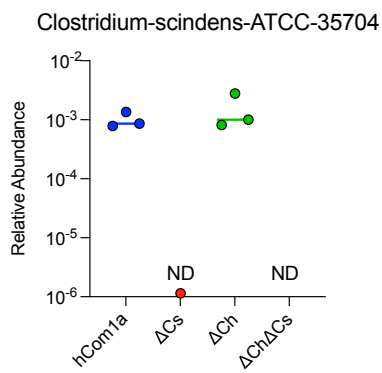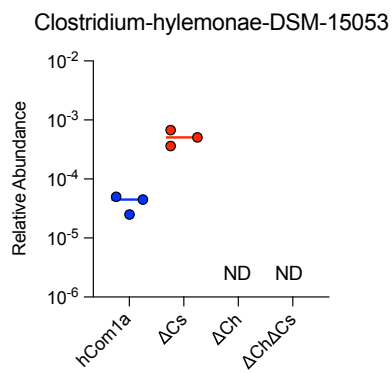**ii**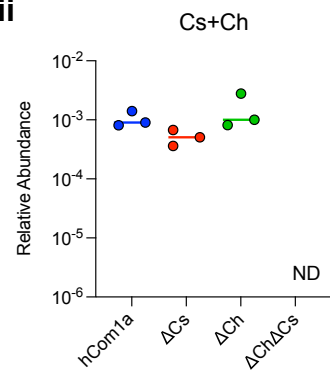**iii**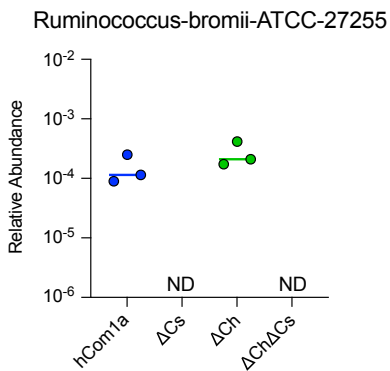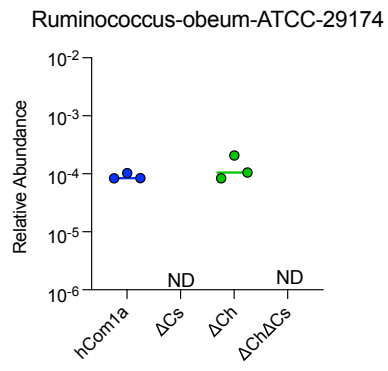*Clostridium-sporogenes*-ATCC-15579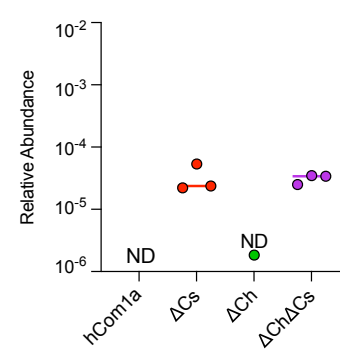*Roseburia-intestinalis*-L1-82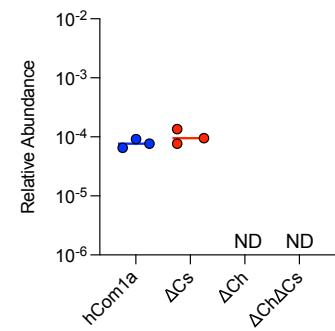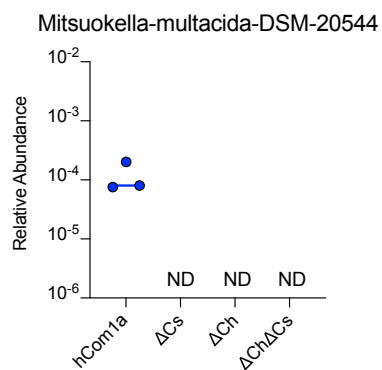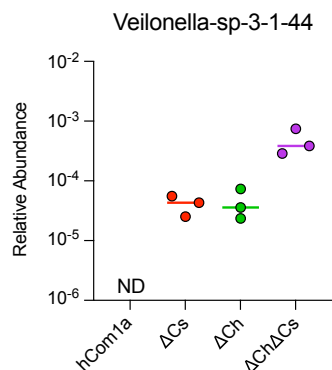*Eubacterium-ventriosum*-ATCC-27560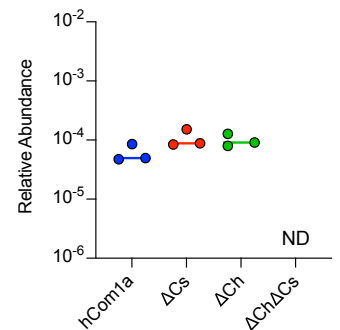*Dorea-longicatena*-DSM-13814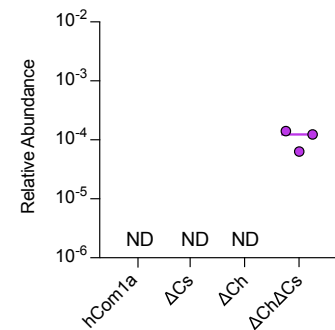**B****i**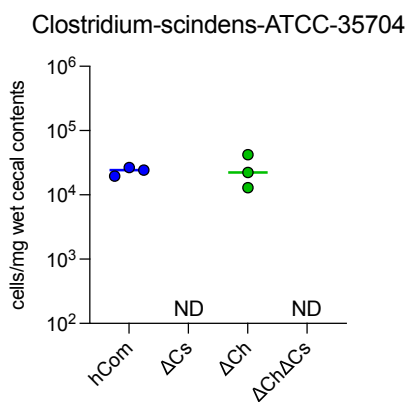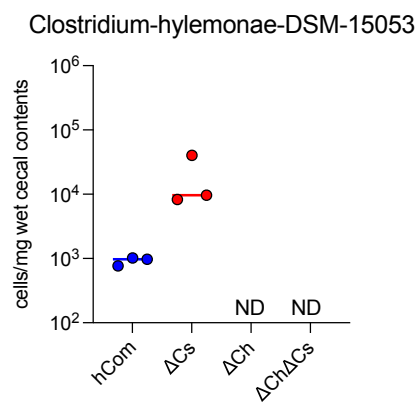**ii**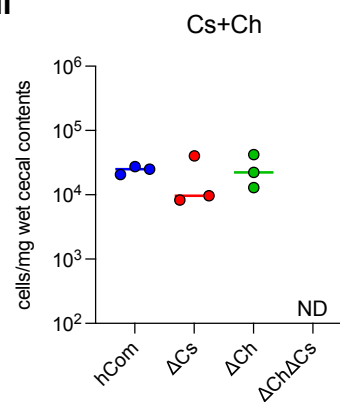**iv**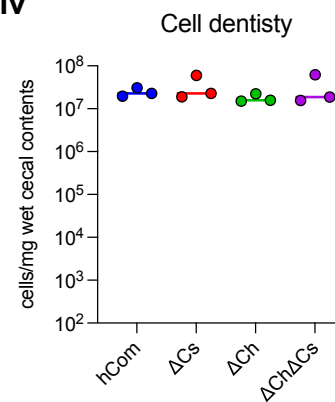**iii**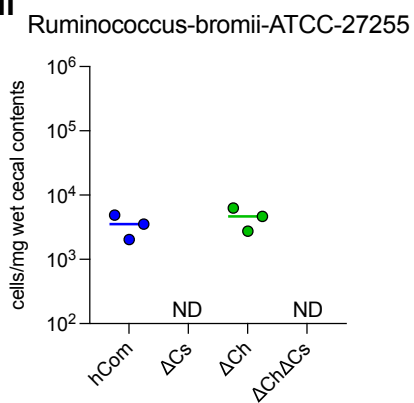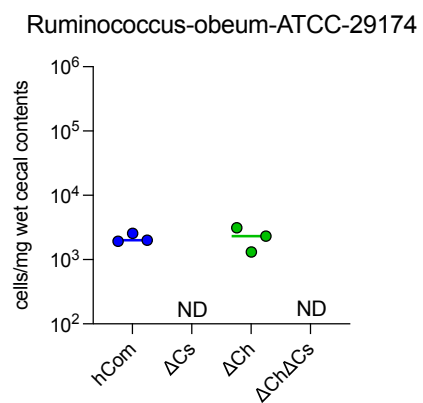*Clostridium-sporogenes*-ATCC-15579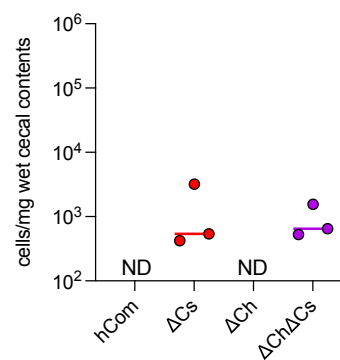*Roseburia-intestinalis*-L1-82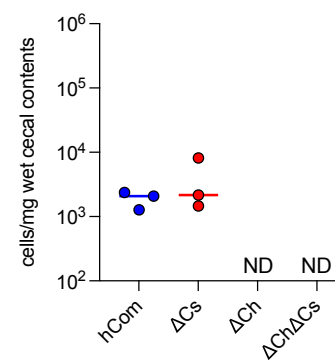*Mitsuokella-multacida*-DSM-20544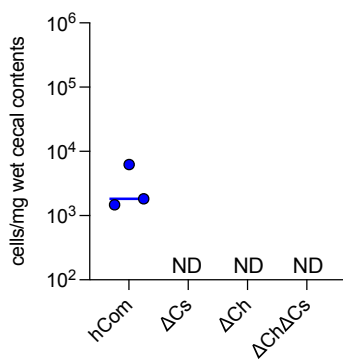*Veilonella-sp-3-1-44*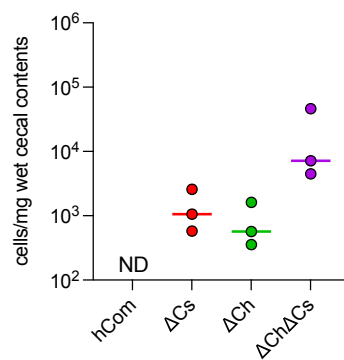*Eubacterium-ventriosum*-ATCC-27560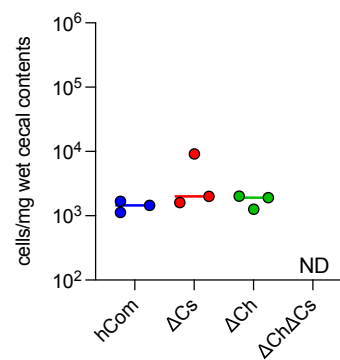*Dorea-longicatena*-DSM-13814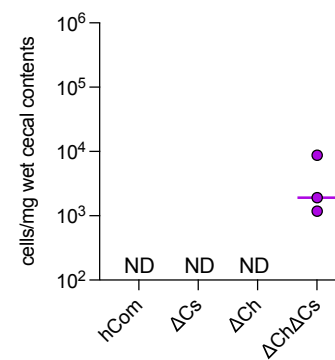

Supplement: NIHMS1905469-supplement-2.pdf [file NIHMS1905469-supplement-2.pdf]
