# Supplementary material
Source: PubMed Central journal article supplement (PMC10299816)

**A***Dorea longicatena* DSM 13814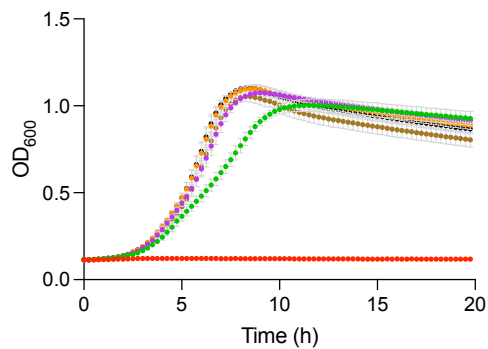*Clostridium sporogenes* ATCC 15579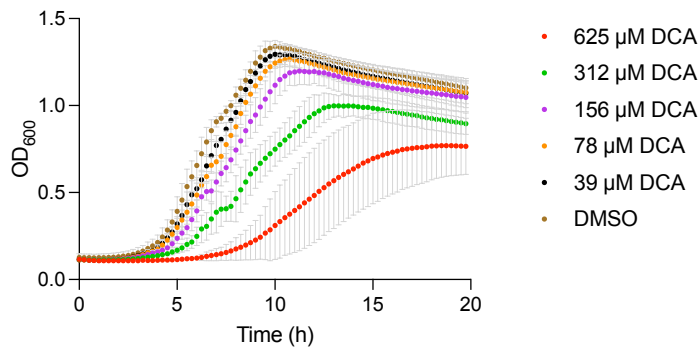**B***Dorea longicatena* DSM 13814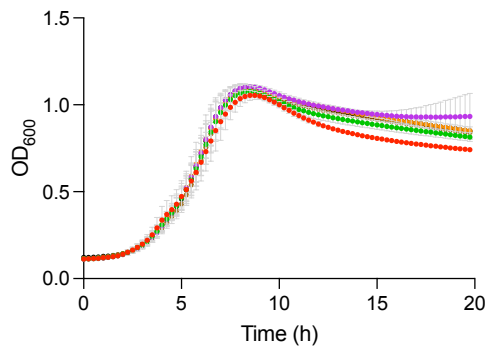*Clostridium sporogenes* ATCC 15579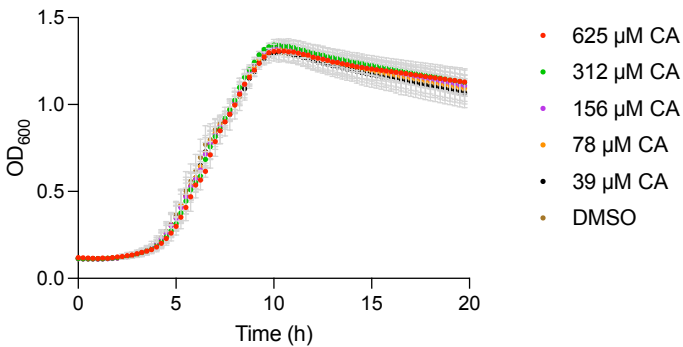**C**

DCA concentration

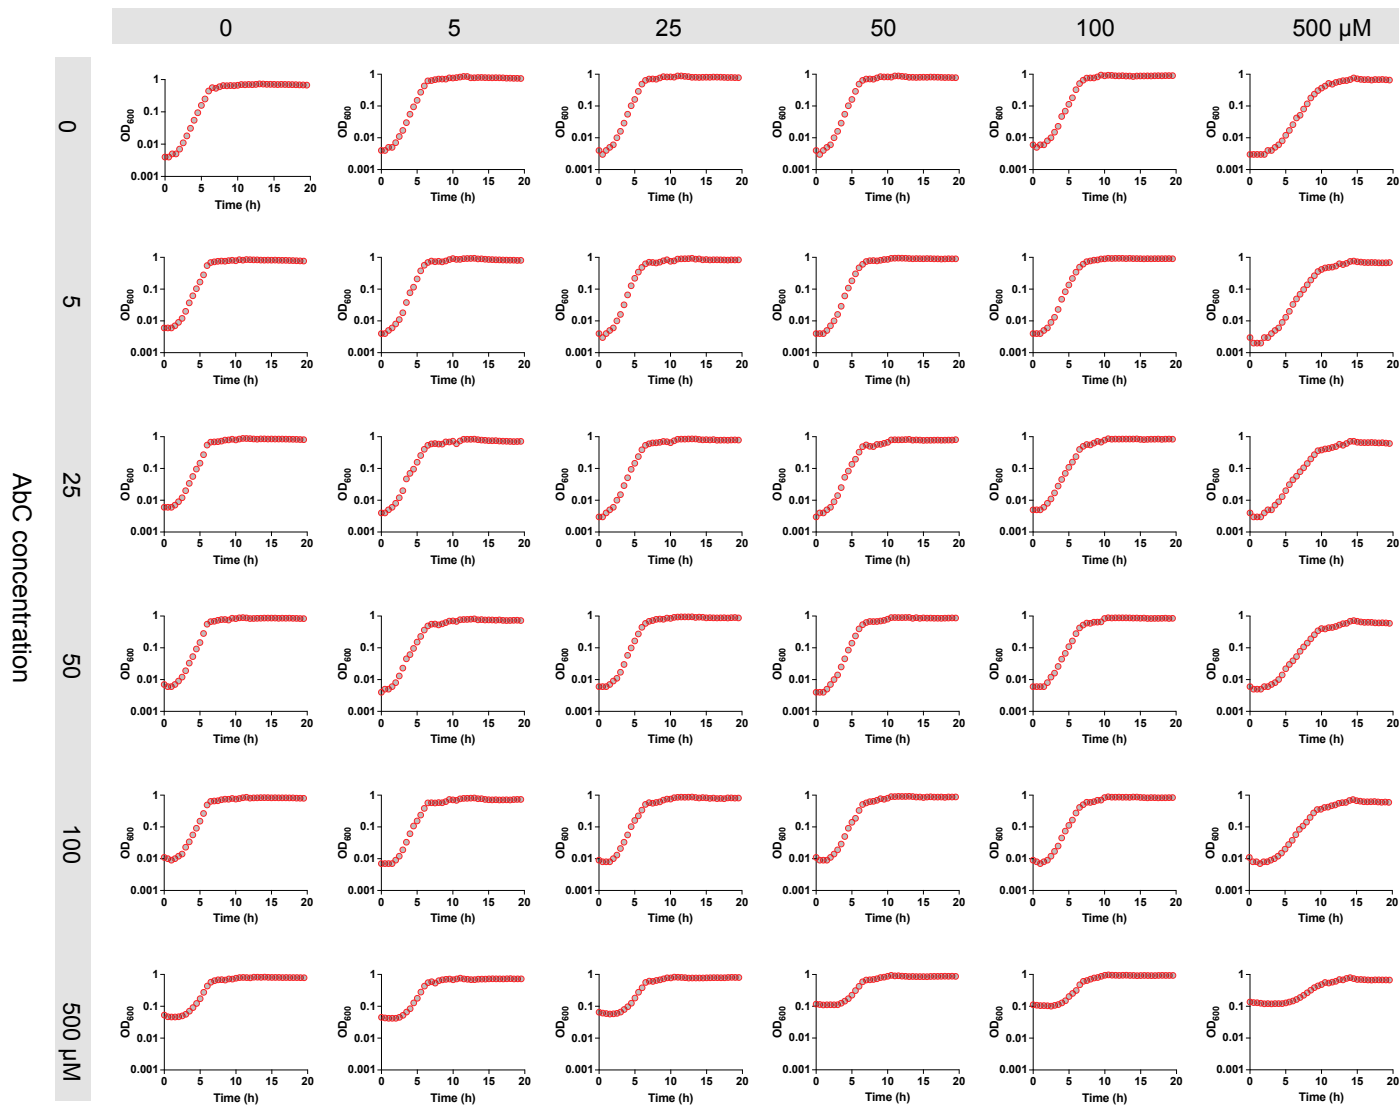

Supplement: NIHMS1905469-supplement-4.pdf [file NIHMS1905469-supplement-4.pdf]
