# Supplementary material
Source: PubMed Central journal article supplement (PMC10299816)

**A**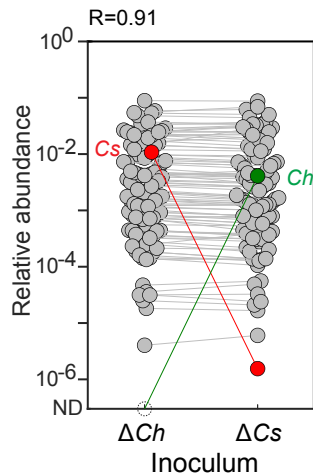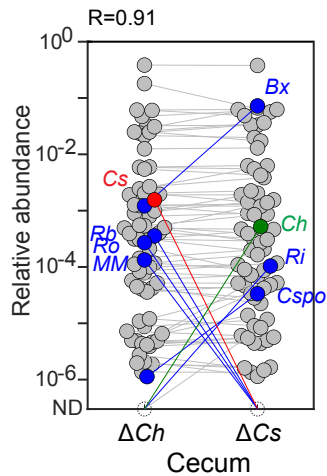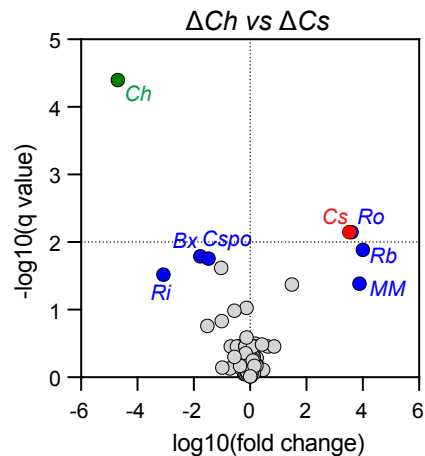**B**

**Small perturbation of a highly complex synthetic community**

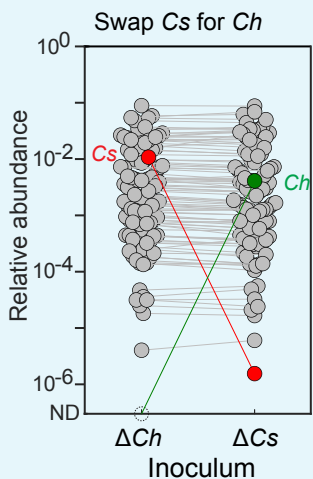

**A few strains change in relative abundance by >10-fold**

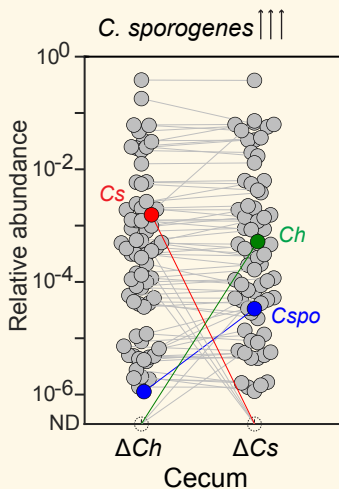

**Large increase in reduced AAA metabolites**

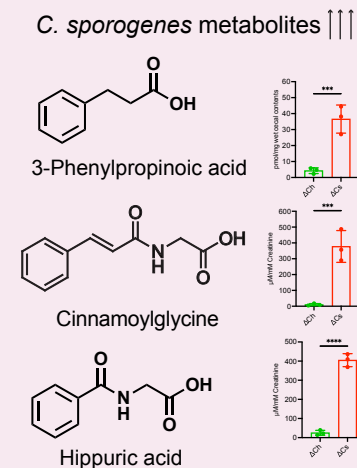

**Concomitant decrease in oxidized AAA metabolites**

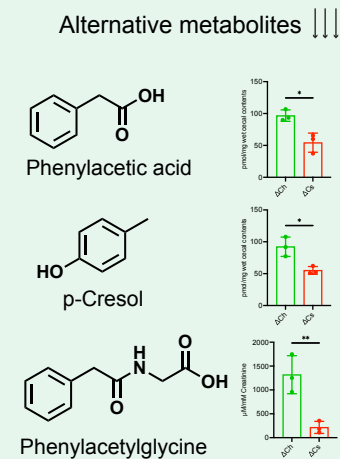

Supplement: NIHMS1905469-supplement-5.pdf [file NIHMS1905469-supplement-5.pdf]
