# Supplementary material
Source: PubMed Central journal article supplement (PMC10299816)

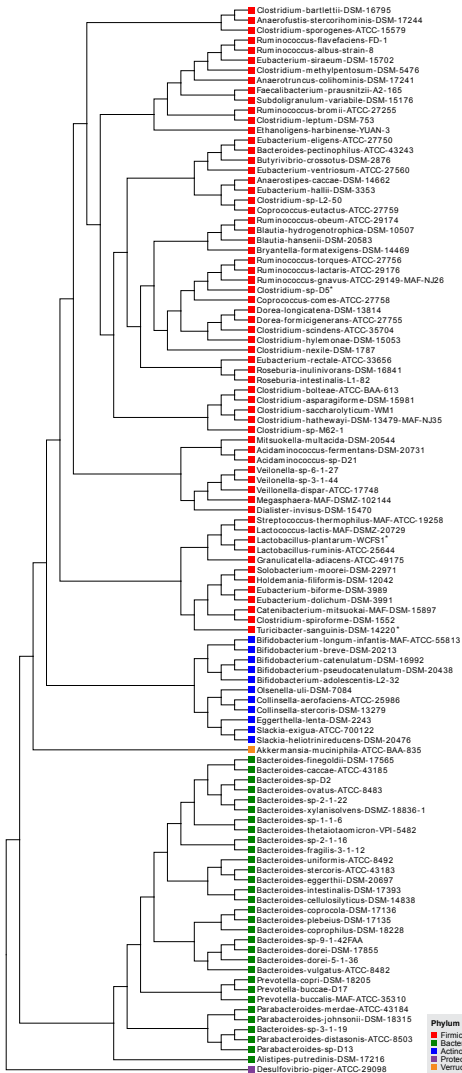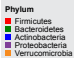

Supplement: NIHMS1905469-supplement-1.pdf [file NIHMS1905469-supplement-1.pdf]

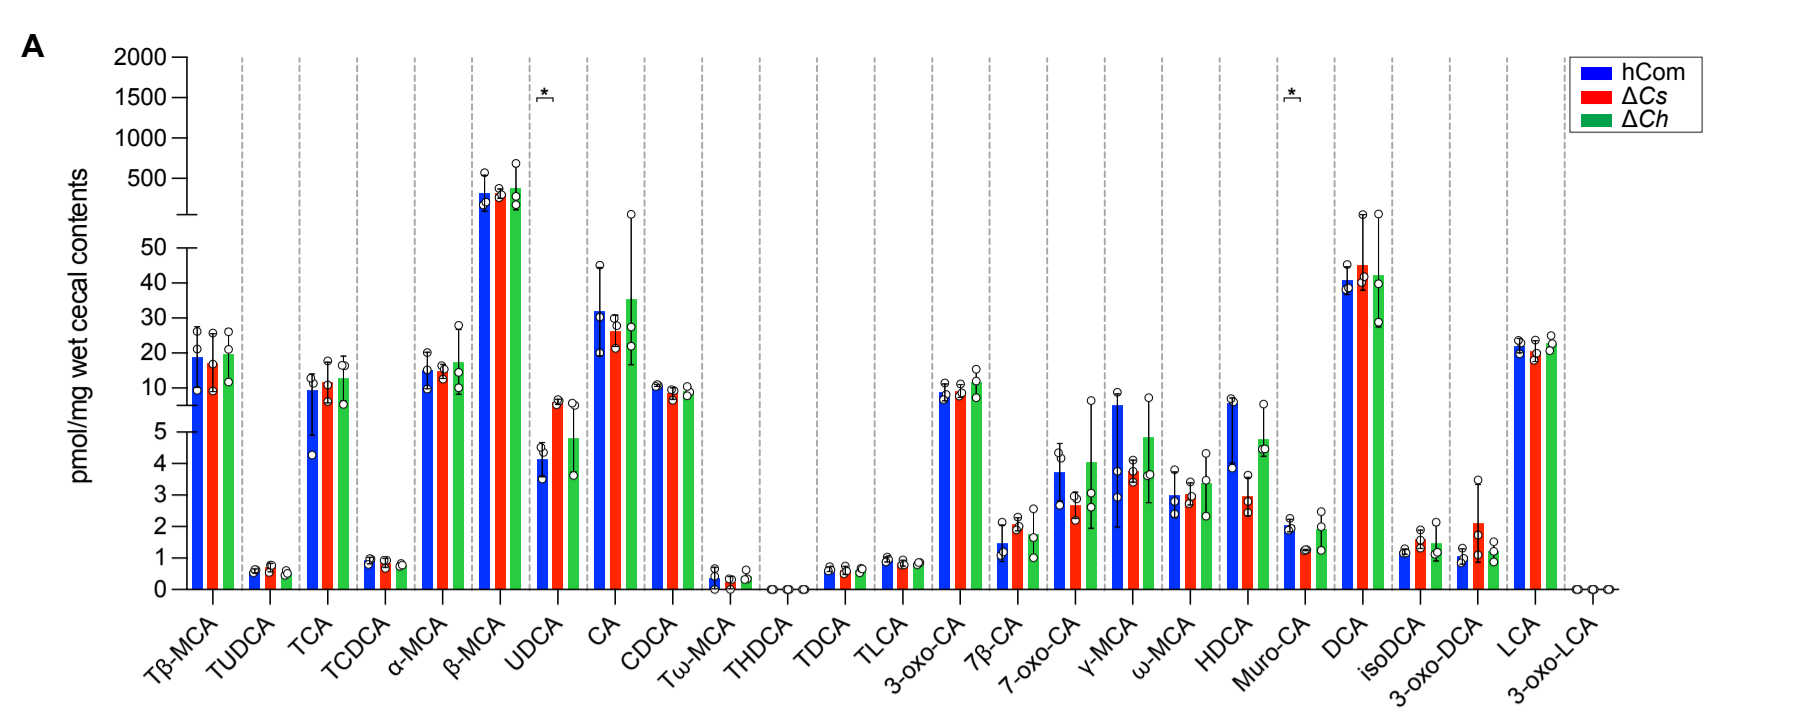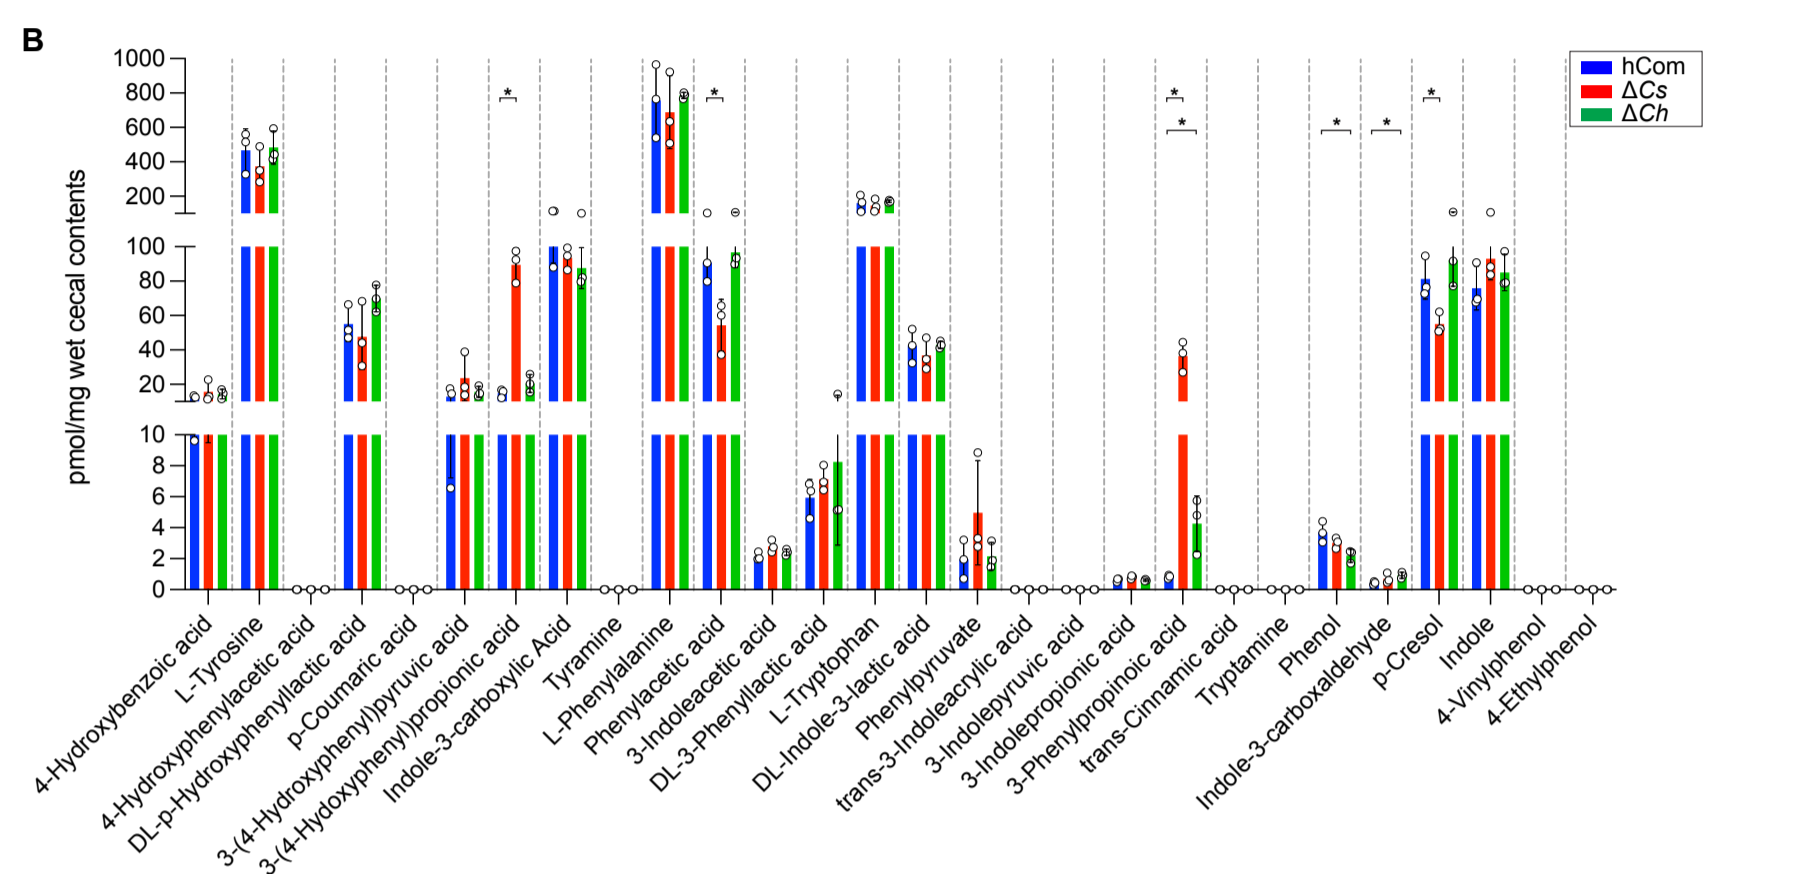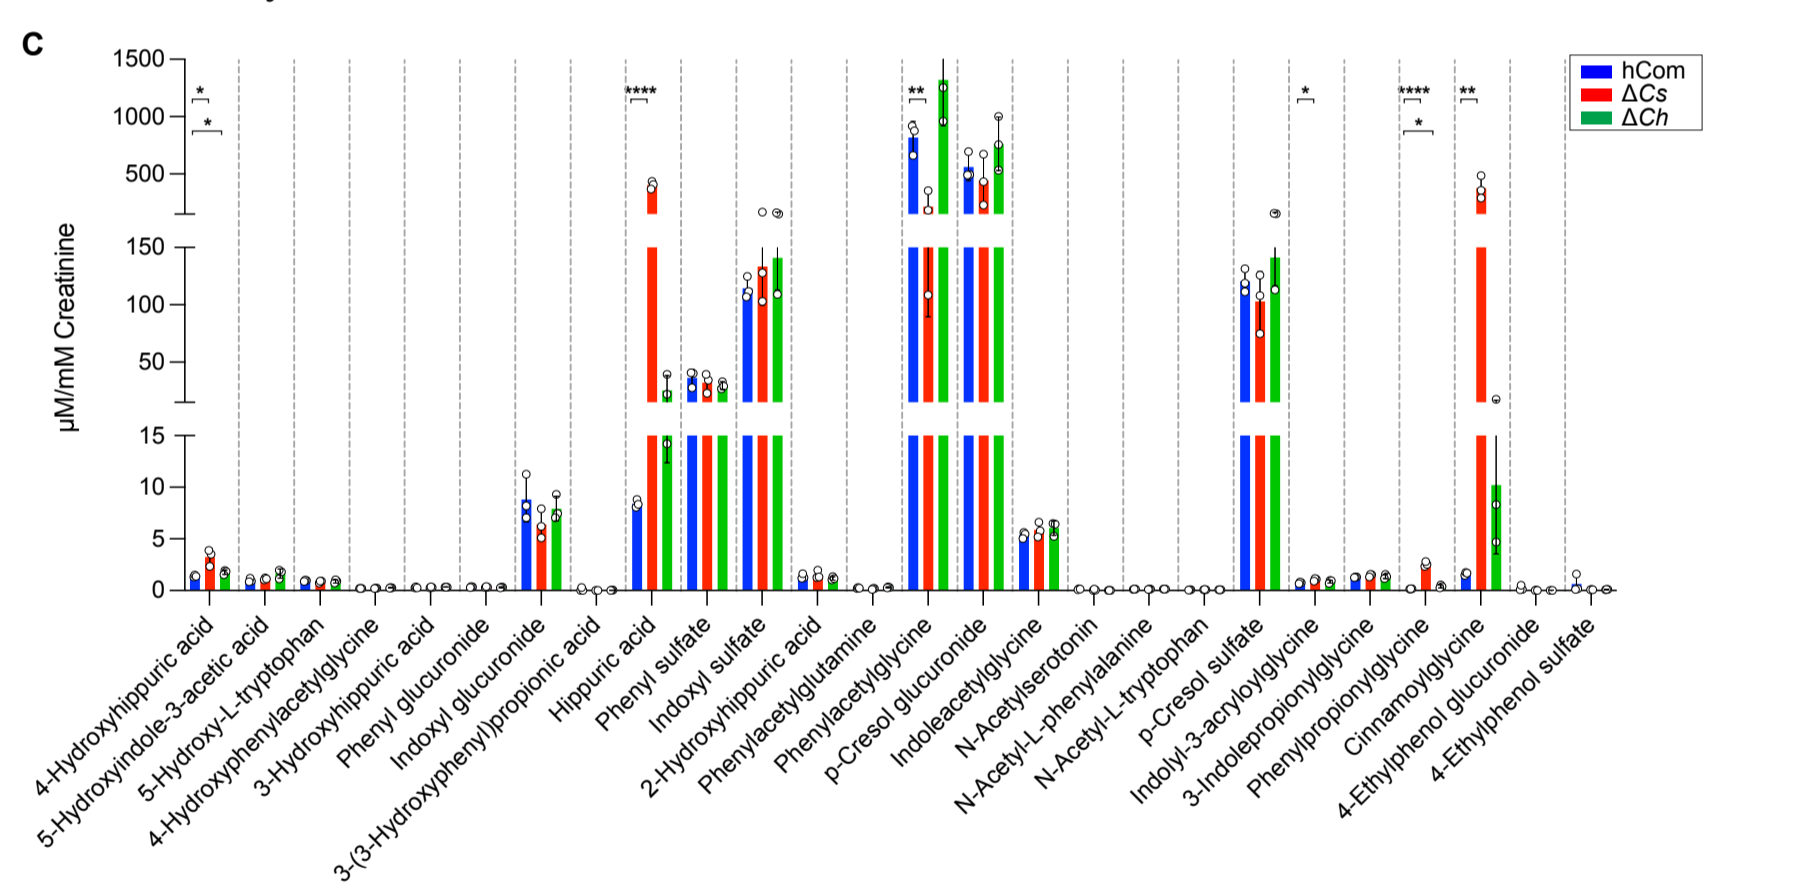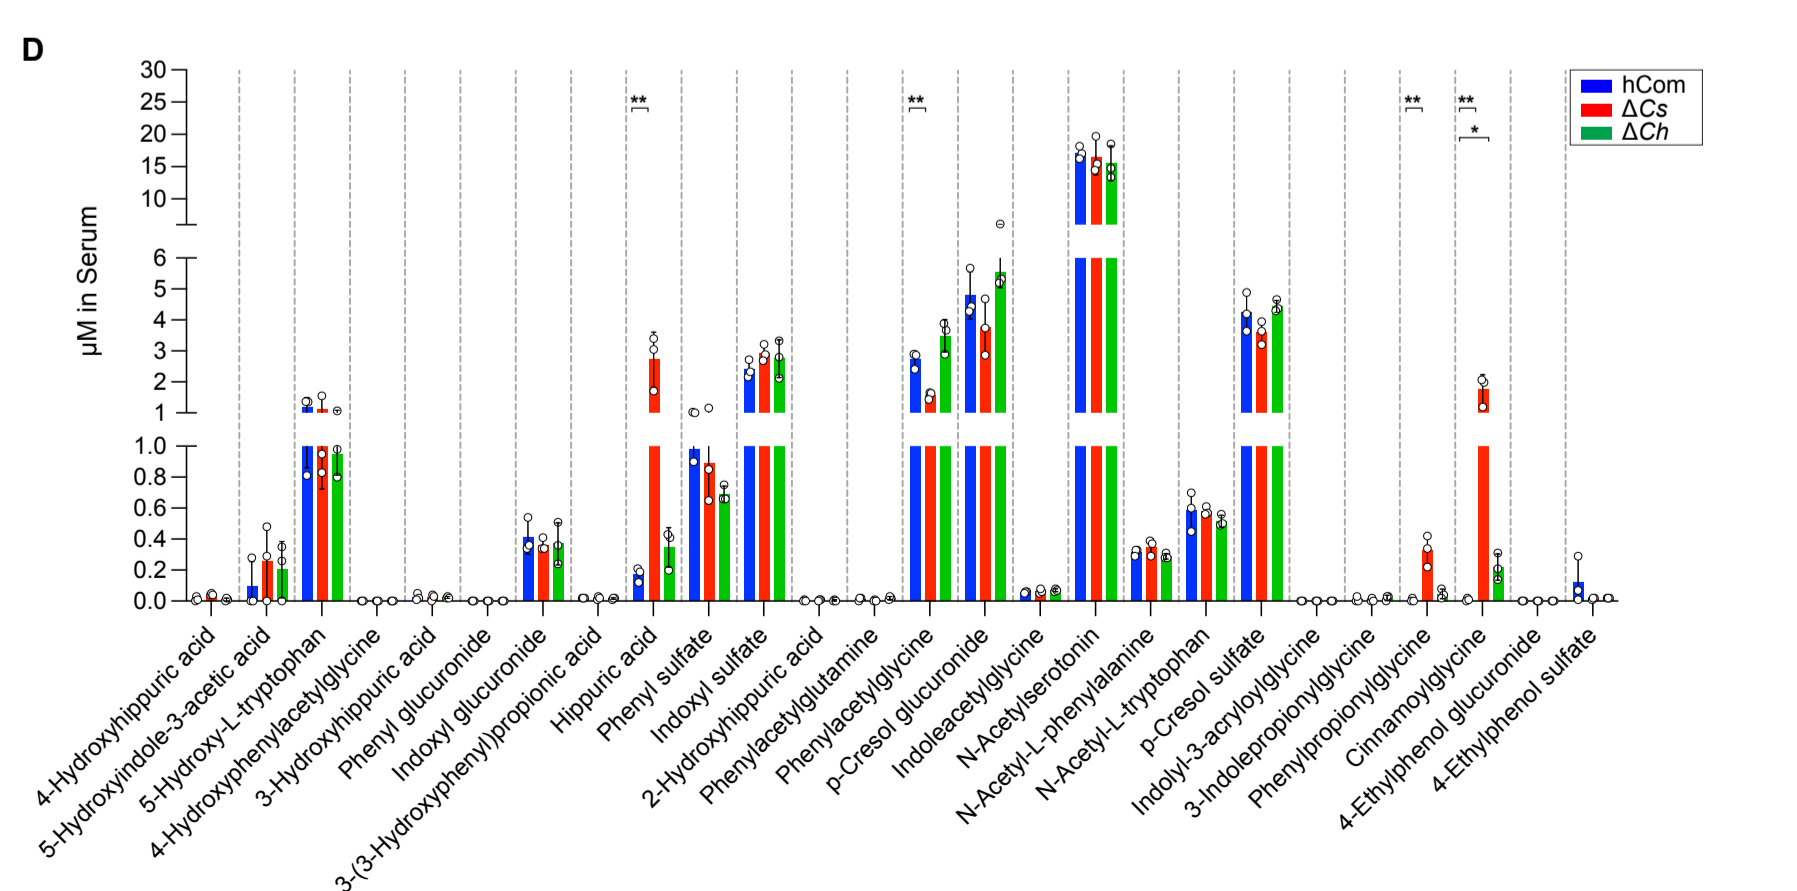

Supplement: NIHMS1905469-supplement-3.pdf [file NIHMS1905469-supplement-3.pdf]

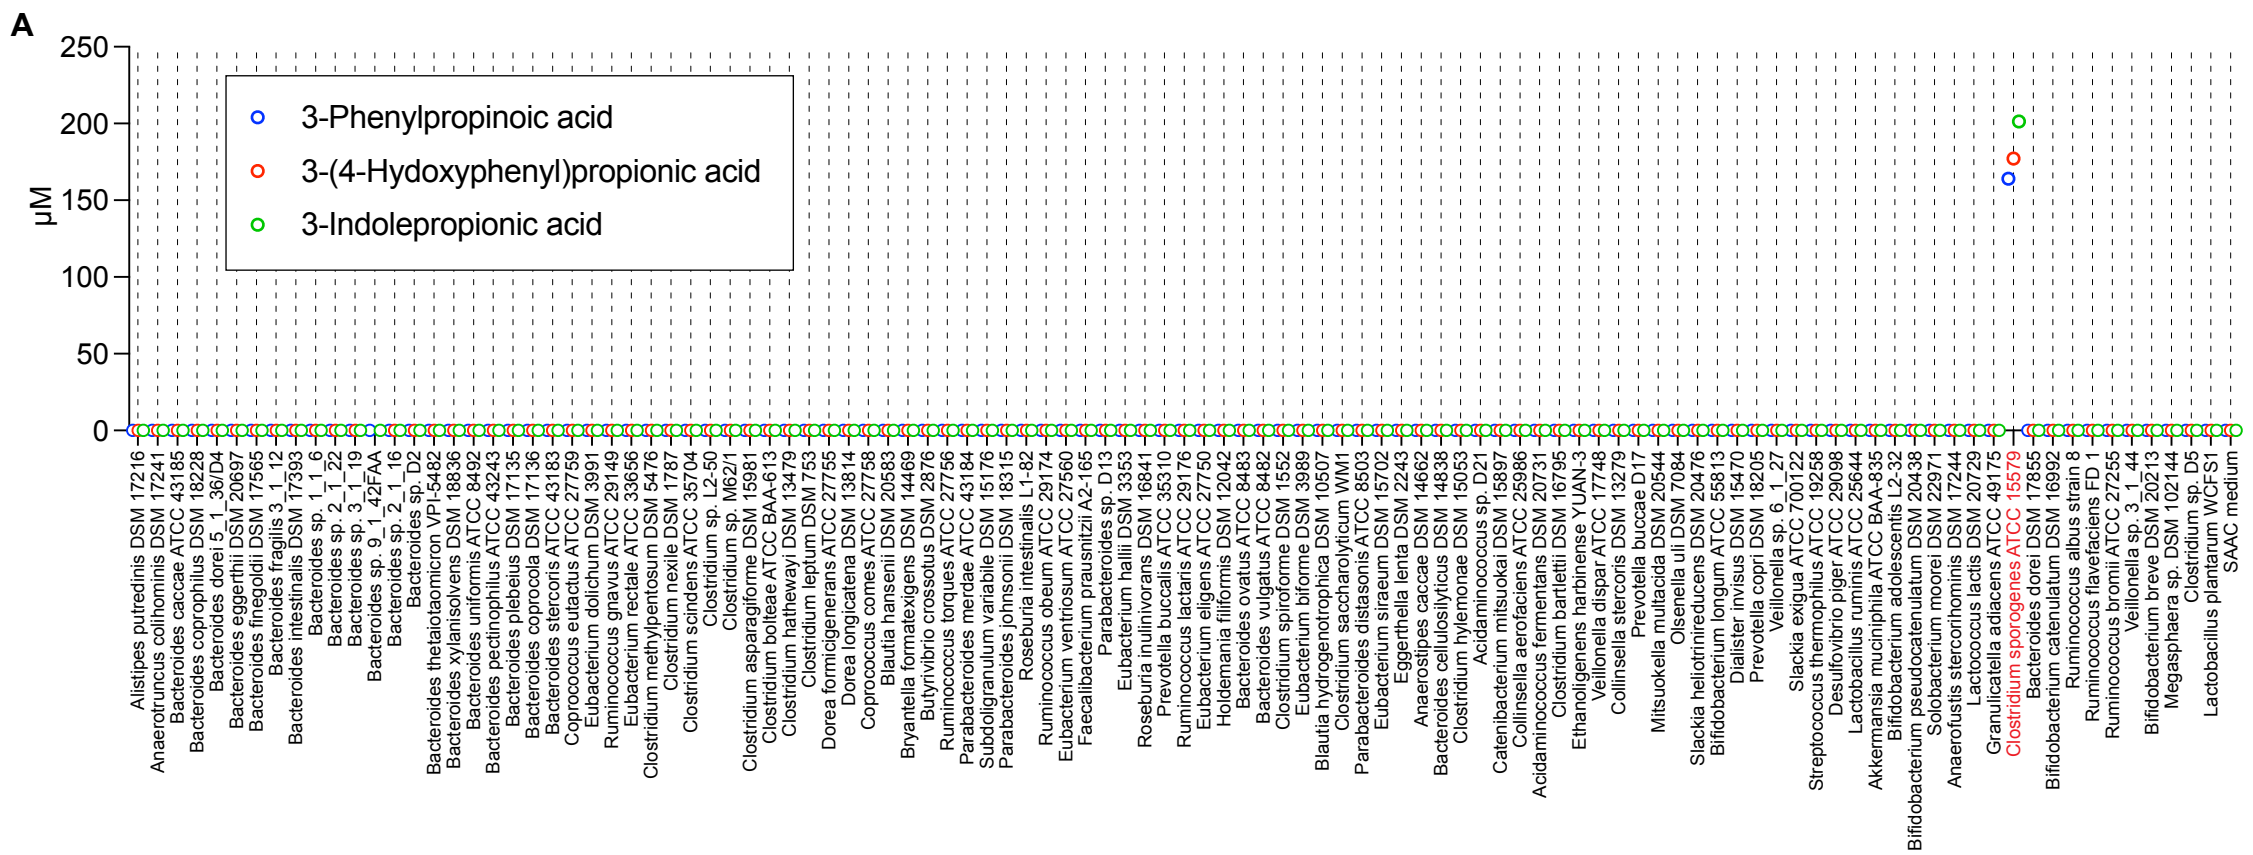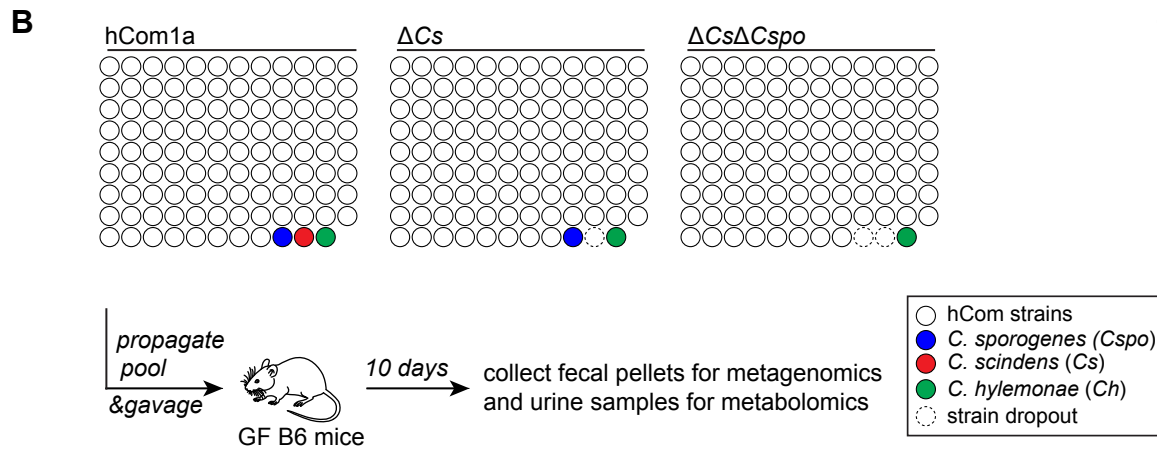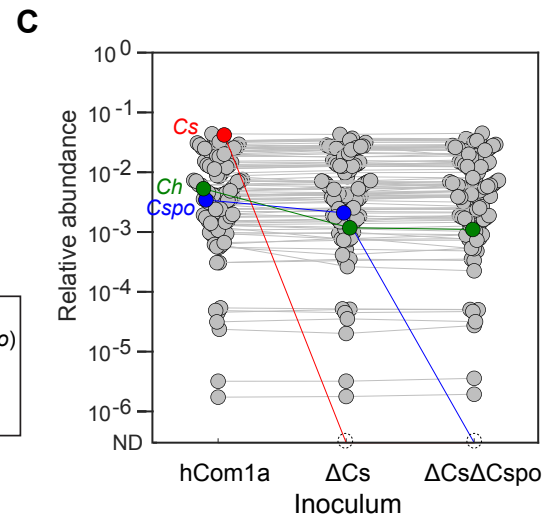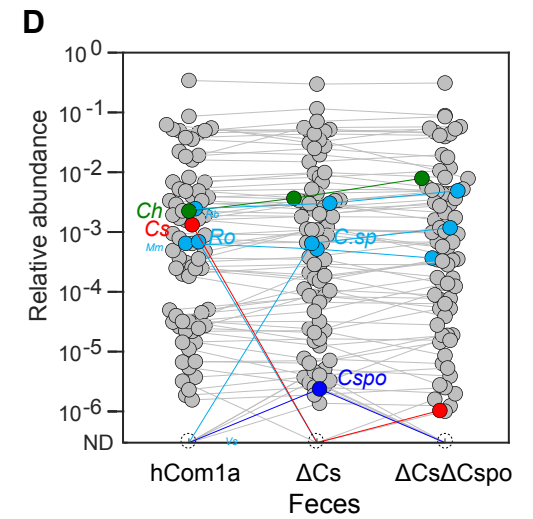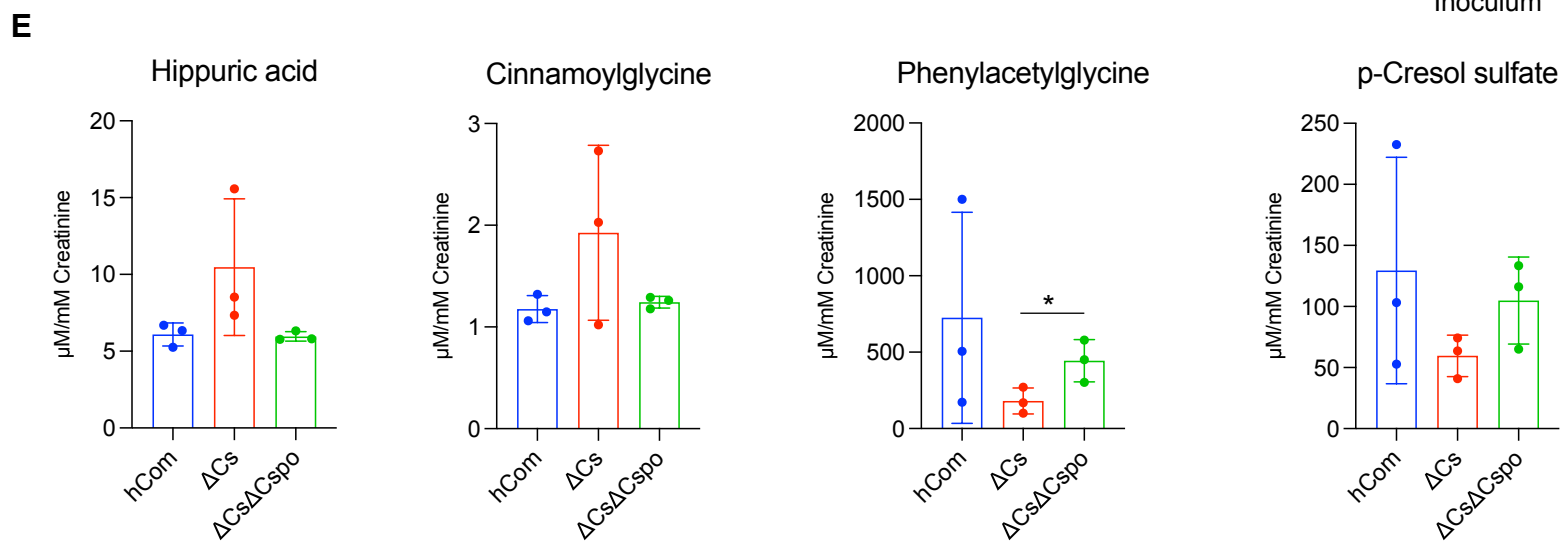

Supplement: NIHMS1905469-supplement-6.pdf [file NIHMS1905469-supplement-6.pdf]

**A**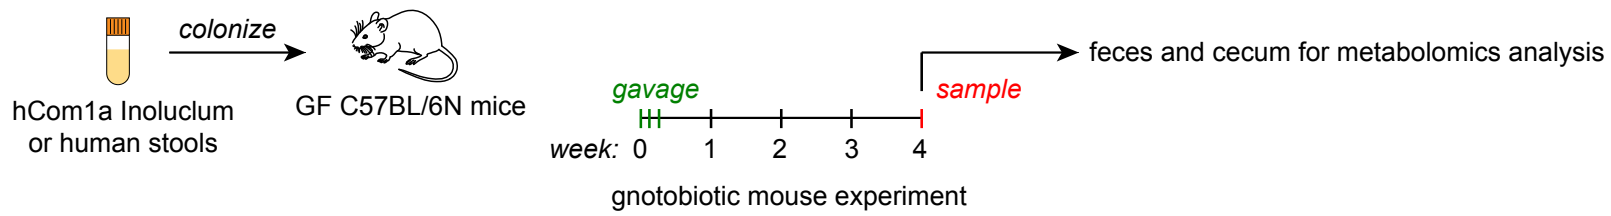**B**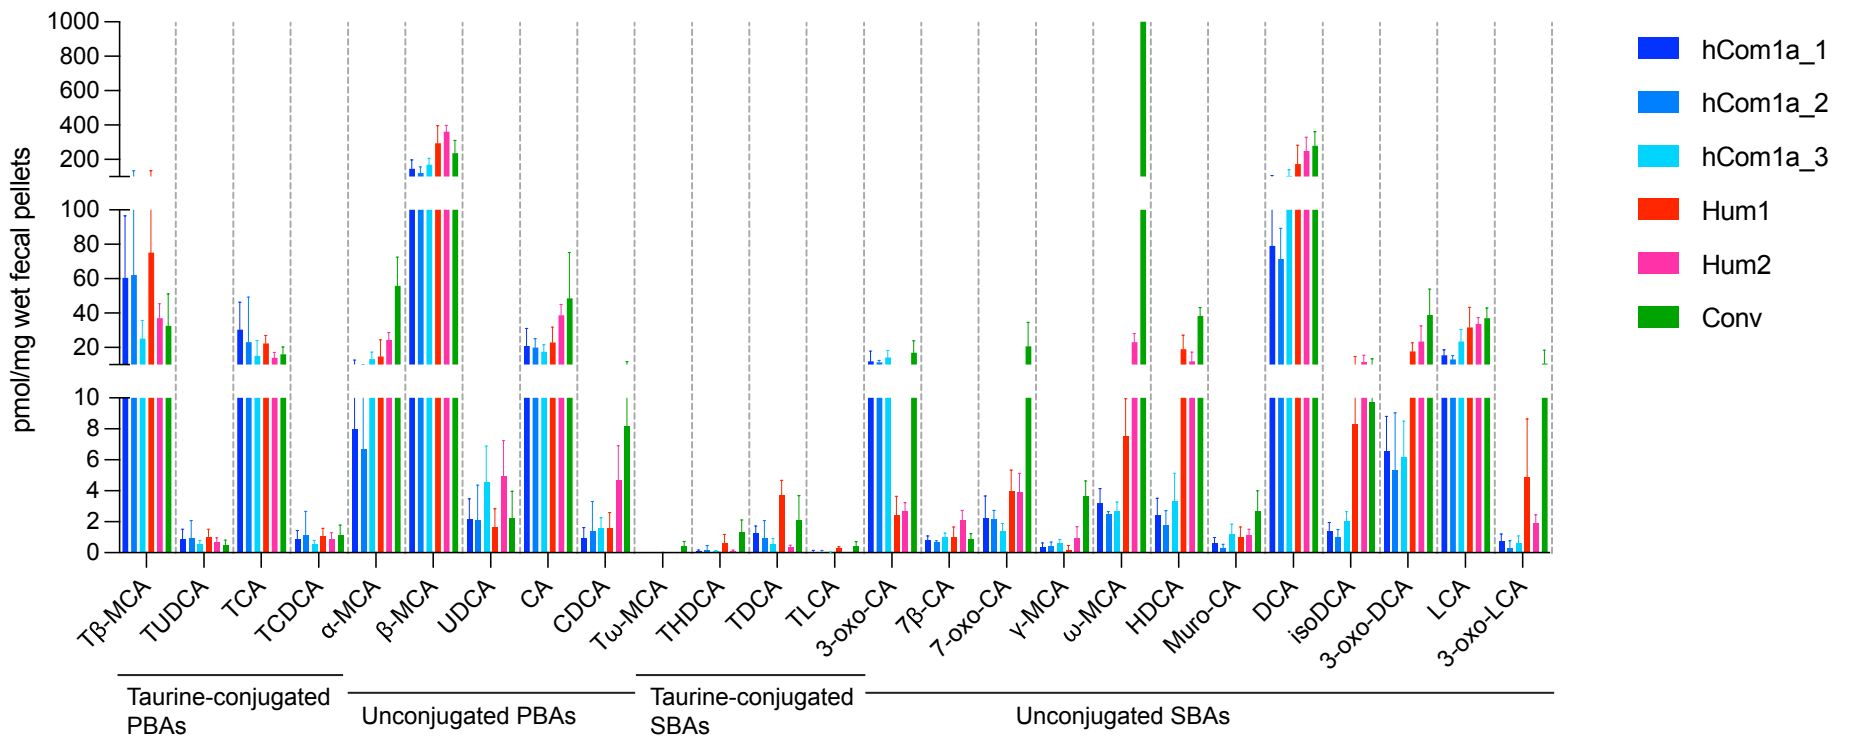**C**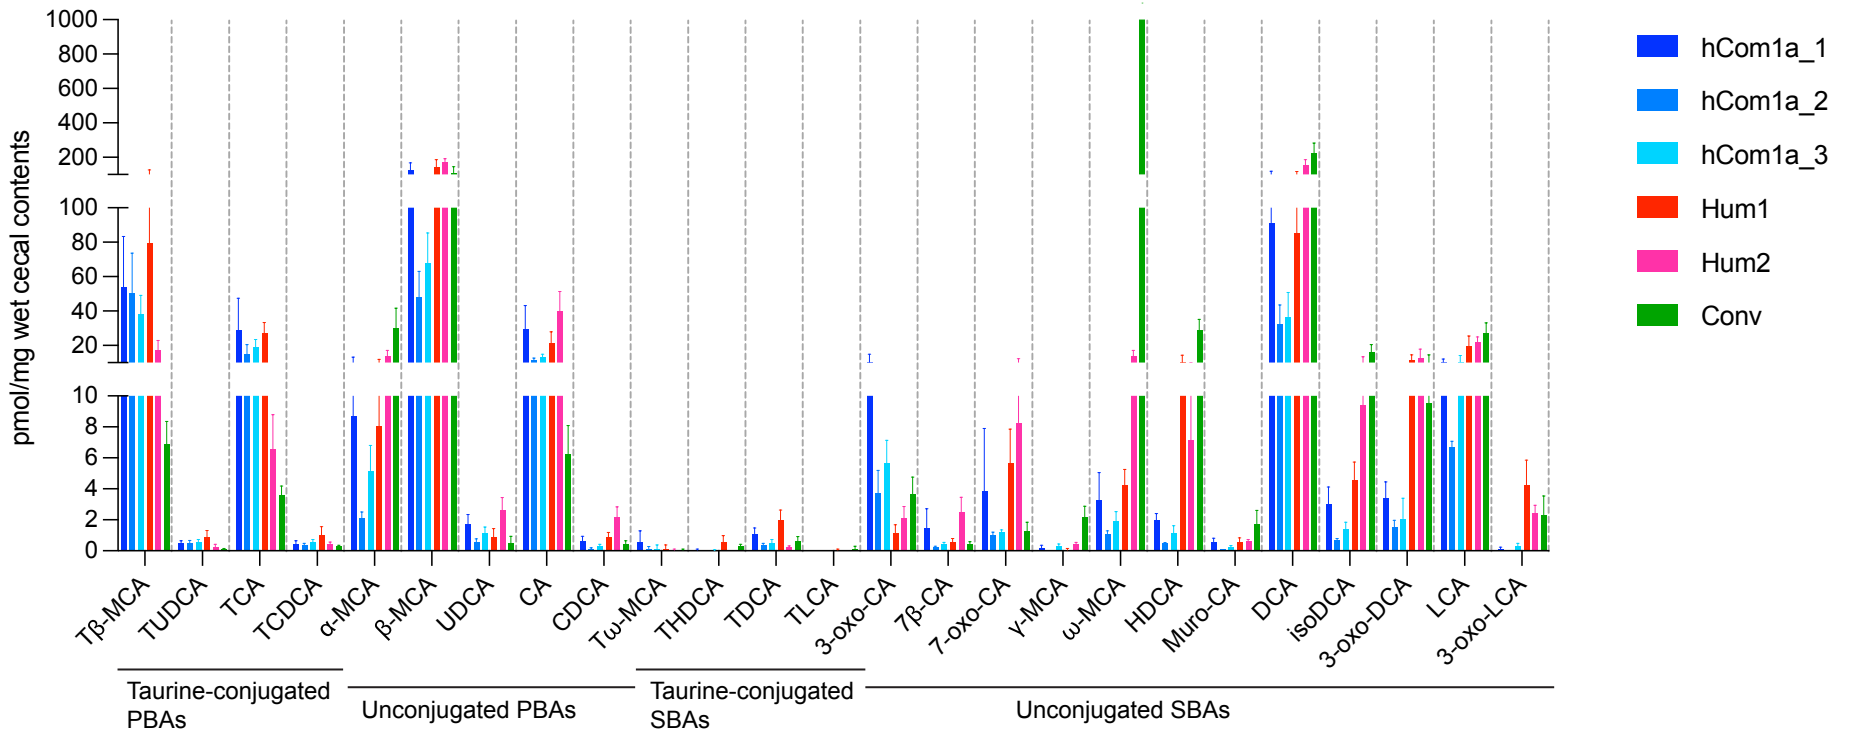**D**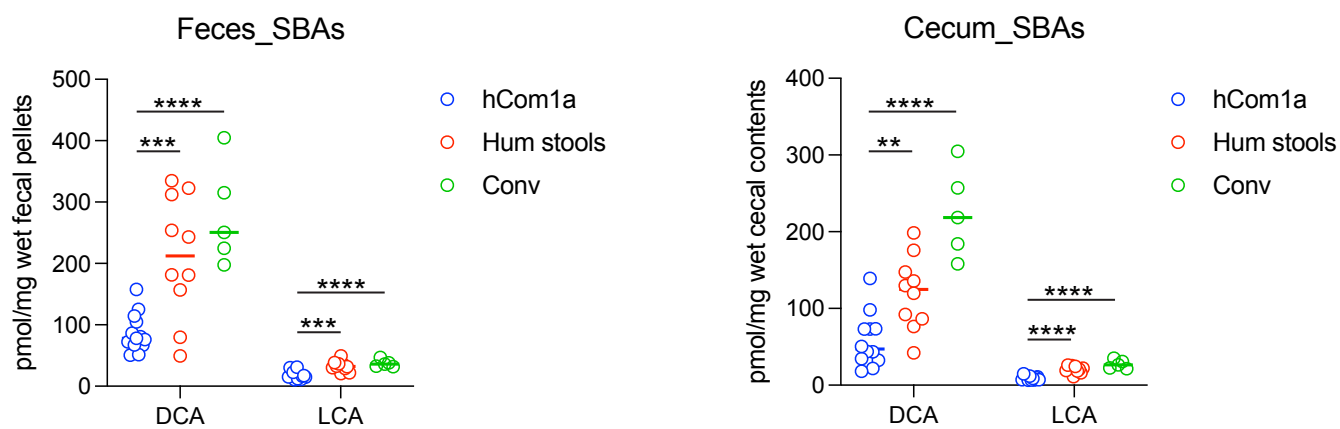

Supplement: NIHMS1905469-supplement-7.pdf [file NIHMS1905469-supplement-7.pdf]
